# Supplementary material for: Physical Exercise and Dietary Supplementation in Middle-Aged and Older Women: A Systematic Review
Source: MDPI journal article supplement (doi:10.3390/jcm12237271), 2023-11-23
Supplement: s1 [file s1]

## TERMS USED IN THE SEARCH.

Table S1. Decs/mesh terms used in the search.

| Descriptors in<br>Health<br>Sciences<br>(DeCS) -<br>Spanish | Medical<br>Subject<br>Headings<br>(MeSH) | Controlled<br>language | Natural language                                                                                                                                                                                                                                                                                                                                                                                                                                                                                                                                                                       |
|-------------------------------------------------------------|------------------------------------------|------------------------|----------------------------------------------------------------------------------------------------------------------------------------------------------------------------------------------------------------------------------------------------------------------------------------------------------------------------------------------------------------------------------------------------------------------------------------------------------------------------------------------------------------------------------------------------------------------------------------|
| Menopausia                                                  | Menopause                                | Menopause              | Change of life female                                                                                                                                                                                                                                                                                                                                                                                                                                                                                                                                                                  |
| Ejercicio                                                   | Exercise                                 | Exercise               | Exercises OR "Physical Activity" OR "Activities Physical" OR<br>"Activity Physical" OR "Physical Activities" OR "Exercise<br>Physical" OR "Exercises Physical" OR "Physical Exercise" OR<br>"Physical Exercises" OR "Acute Exercise" OR "Acute<br>Exercises" OR "Exercise Acute" OR "Exercises Acute" OR<br>"Exercise Isometric" OR "Exercises Isometric" OR "Isometric<br>Exercises" OR "Isometric Exercise" OR "Exercise Aerobic" OR<br>"Aerobic Exercise" OR "Aerobic Exercises" OR "Exercises<br>Aerobic" OR "Exercise Training" OR "Exercise Trainings" OR<br>"Training Exercise" |
| Suplementos<br>dietéticos                                   | Dietary<br>supplements                   | Dietary<br>supplements | "Dietary Supplement" OR "Supplements Dietary" OR<br>"Dietary Supplementations" OR "Supplementations Dietary"<br>OR "Food Supplementations" OR "Food Supplements" OR<br>"Food Supplement" OR "Supplement Food" OR<br>"Supplements Food" OR "Nutraceuticals" OR<br>"Nutraceutical" OR "Nutriceuticals" OR "Nutriceutical" OR<br>"Neutraceuticals" OR "Neutraceutical" OR "Herbal<br>Supplements" OR "Herbal Supplement" OR "Supplement<br>Herbal" OR "Supplements Herbal"                                                                                                                |

Source: self made.
